# Supplementary material for: Rapid, microwave-assisted synthesis of Gd2O3and Eu:Gd2O3nanocrystals: characterization, magnetic, optical and biological studies
Source: Royal Society of Chemistry journal article supplement (doi:10.1039/c4tb00763h), 2014-07-02
Supplement: c4tb00763h1.pdf [file c4tb00763h1.pdf]

## Electronic Supplementary Information

### *Rapid, Microwave-Assisted Synthesis of $Gd_2O_3$ and $Eu:Gd_2O_3$ Nanocrystals: Characterization, Magnetic, Optical and Biological Studies*

Shafquat Majeed<sup>a</sup> and S.A. Shivashankar<sup>\*ab</sup>

<sup>a</sup>Materials Research Centre, <sup>b</sup>Centre for Nano Science and Engineering, Indian Institute of Science, Bangalore-560012, India

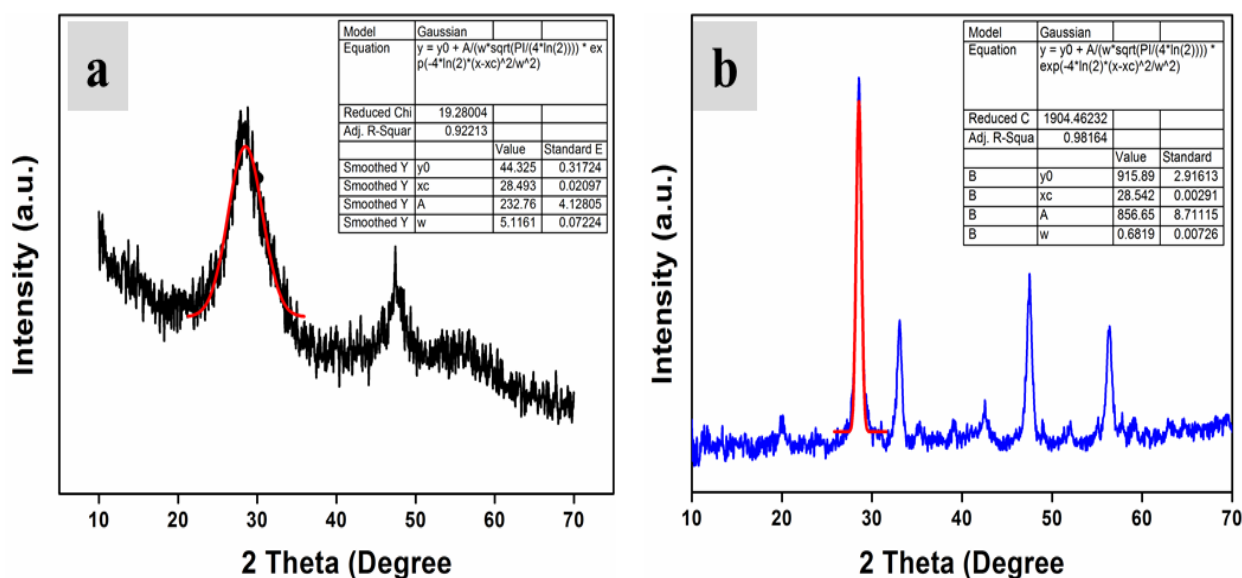

Fig. S1 A Gaussian fit of (222) reflection to calculate the FWHM for as-prepared (a) and annealed  $Gd_2O_3$  nanopowders (b). A full-width-at-half-maximum (FWHM) of  $5.11^\circ$  was obtained for as-prepared material, whereas a value of  $0.68^\circ$  was obtained for  $Gd_2O_3$  powder sample annealed at  $600^\circ\text{C}$  in air for 2 hours, giving a crystallite size of 2 nm and 12 nm, respectively.

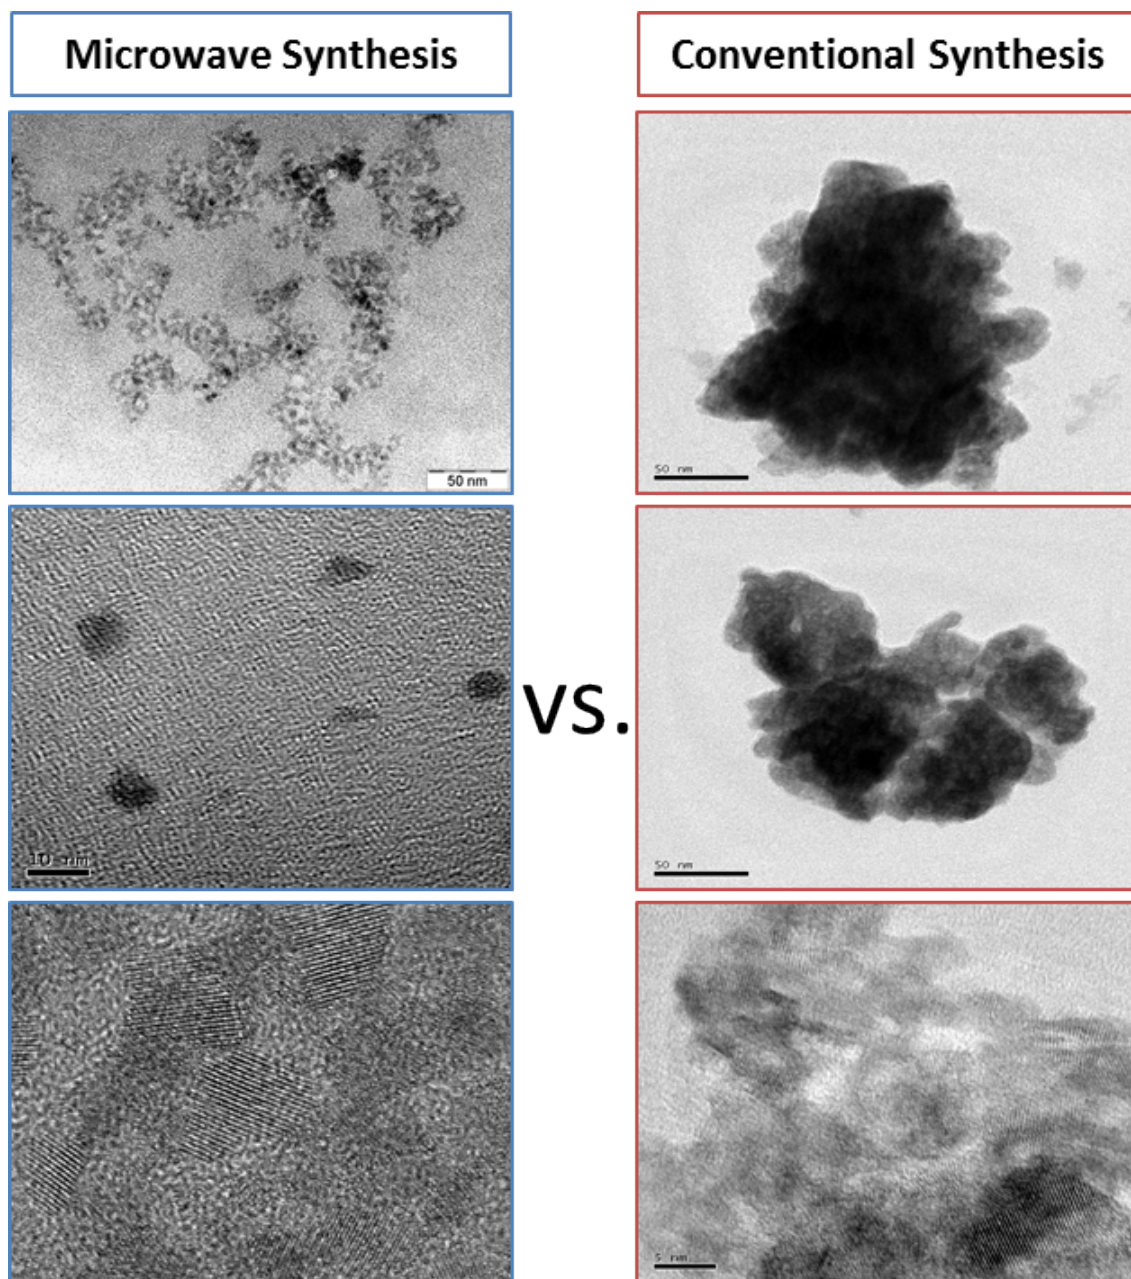

Fig. S2 Nanoparticles of Gd<sub>2</sub>O<sub>3</sub> prepared by microwave-assisted and conventional heating routes. A lot of aggregation is observed in the conventionally heated sample, in contrast with the sample prepared by the microwave irradiation route, which leads to nanoparticles that are less agglomerated, better crystallised, and show low dispersity in size.

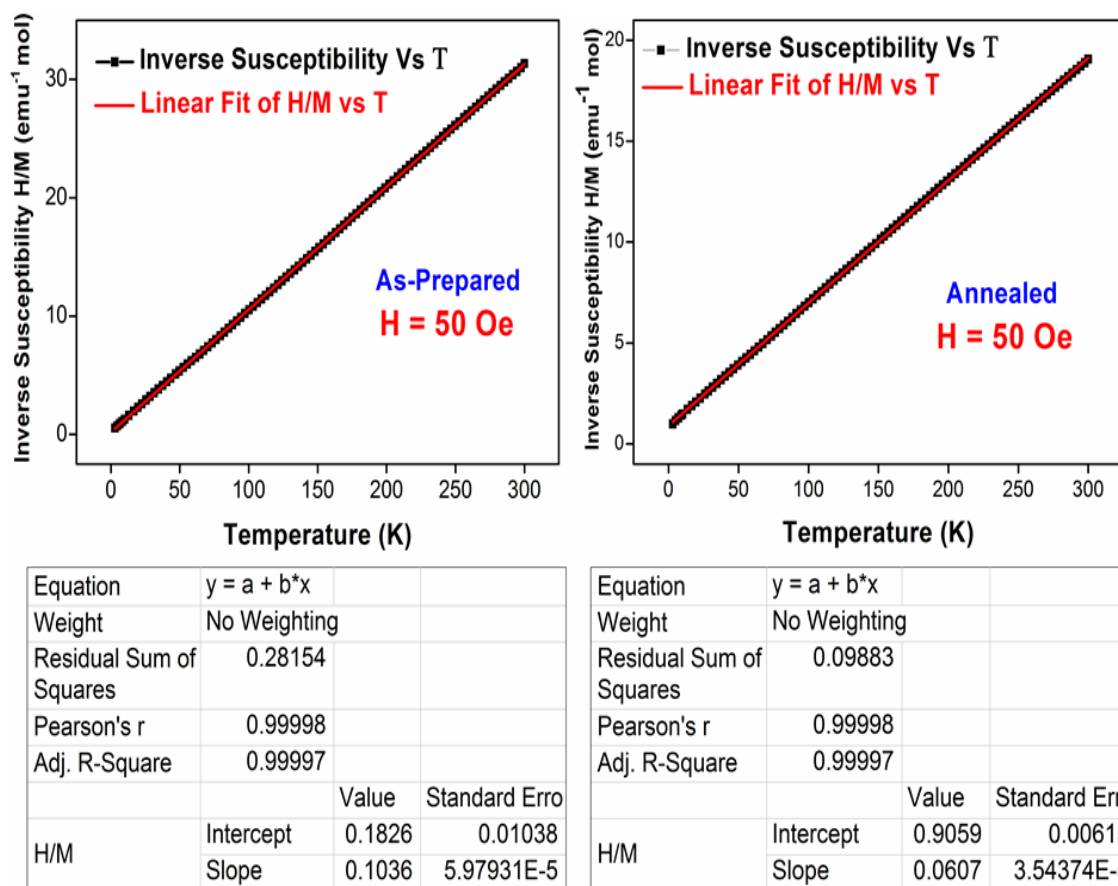

Fig. S3 Inverse magnetic susceptibility ( $H/M$ ) vs. temperature in a magnetic field of 50 Oe, over the temperature range 3 K and 300 K, for as-prepared and annealed  $Gd_2O_3$  nanocrystals (black line). The experimental data are fitted (red line) to the Curie-Weiss equation to obtain the Weiss constant ( $\theta$ ) and the Curie constant ( $C$ ). The fitted results are also listed in two tables: one for the as-prepared  $Gd_2O_3$  nanocrystals and the other for the annealed sample.

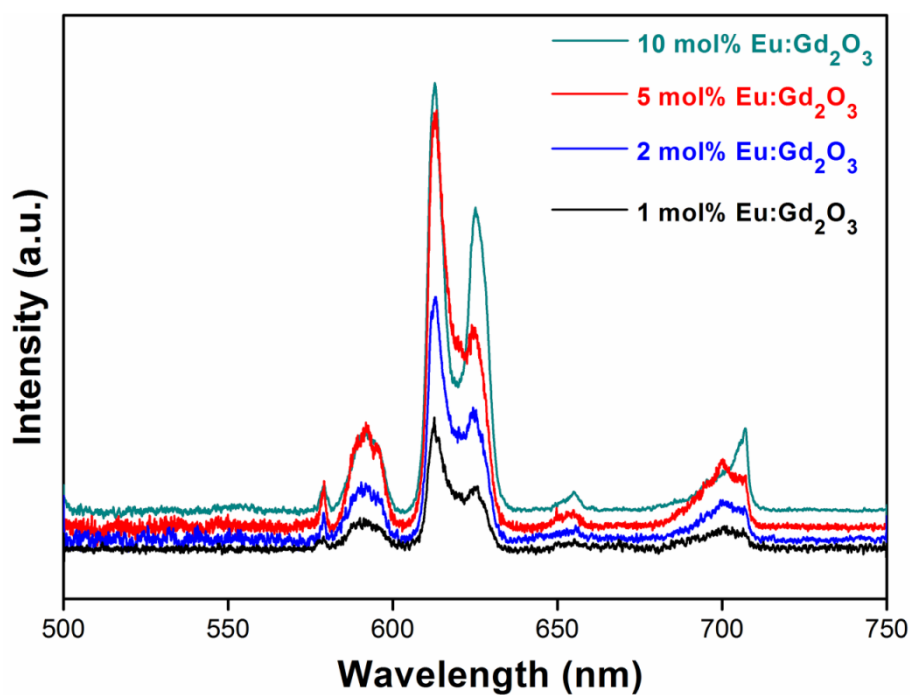

Fig. S4 Variation in PL emission intensity with Eu doping concentration. No appreciable increase in emission intensity is observed after 5 mol% Eu doping concentration. This may be attributed both to concentration quenching and to defect quenching, because a greater proportion of Eu ions lie on the surface of the nanocrystals.

### Undoped ( $\text{Gd}_2\text{O}_3$ )

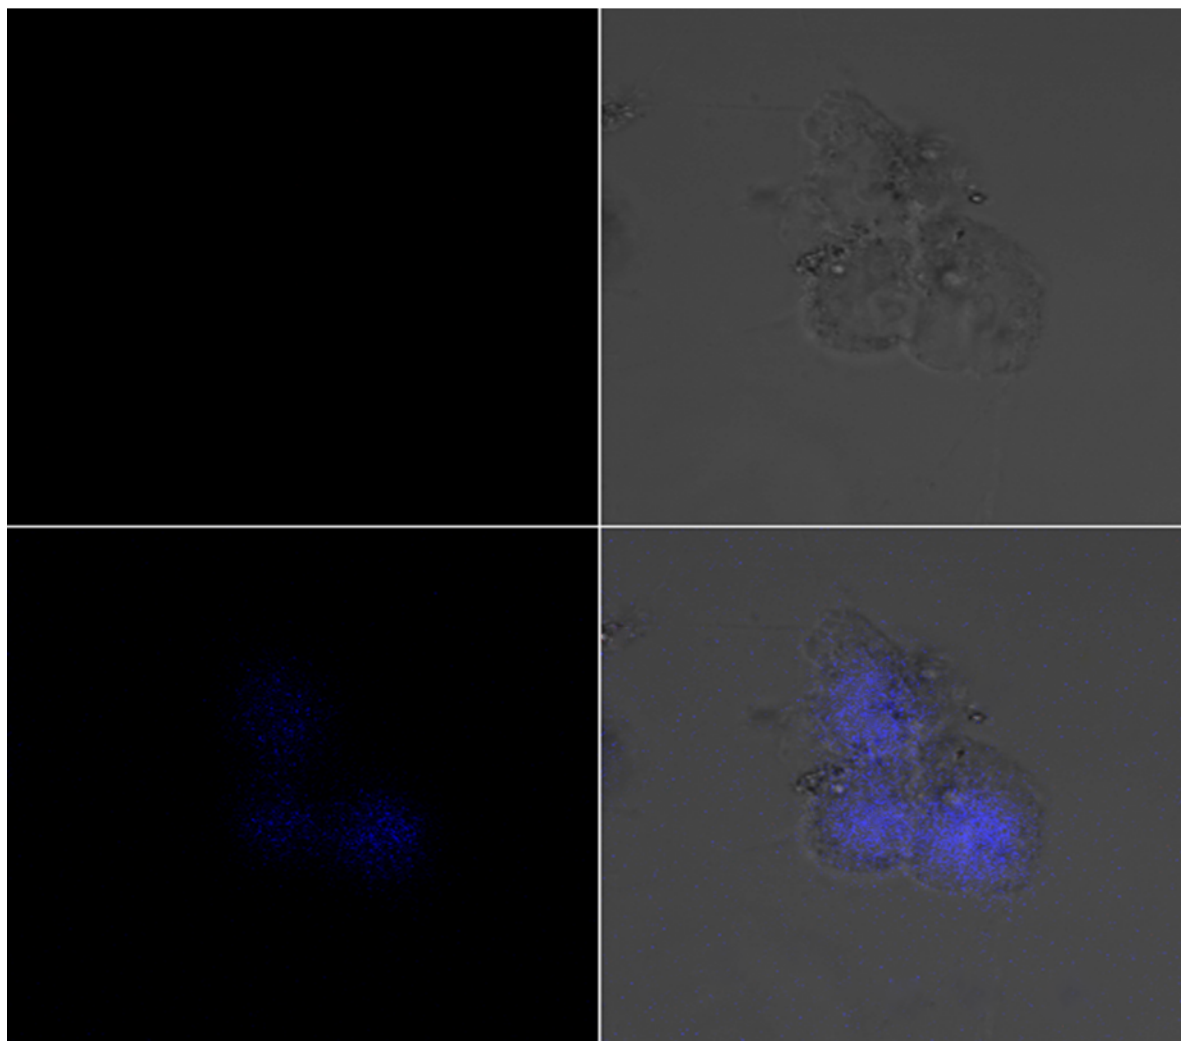

Fig. S5 HEK293 cells treated with undoped  $\text{Gd}_2\text{O}_3$  nanoparticles. As expected, no fluorescence is observed, because  $\text{Gd}^{3+}$  is inactive in visible region.

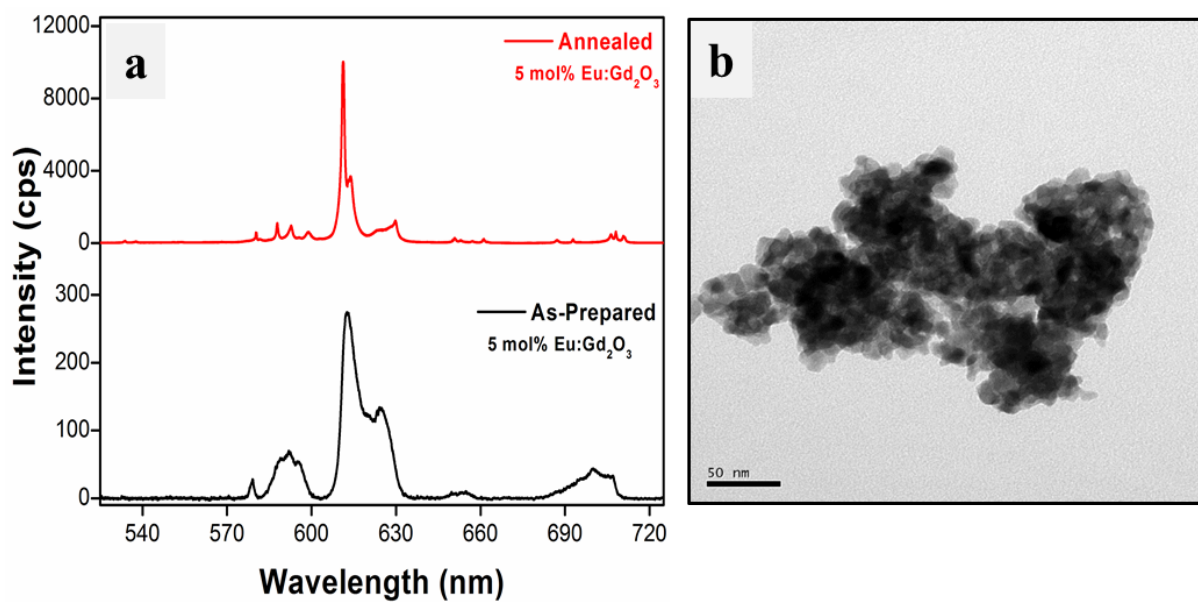

Fig. S6 (a) Comparison of PL emission intensities of as-prepared and annealed Eu:Gd<sub>2</sub>O<sub>3</sub> (5 mol%) nanocrystals (excitation wavelength 325 nm). The annealed powders show more intense emission with sharper peaks than does the as-prepared powder. (b) TEM image of Eu:Gd<sub>2</sub>O<sub>3</sub> annealed at 600 °C for 2 hours showing the agglomerated nanoparticles.
